# Supplementary material for: Melioidosis Knowledge Awareness in Three Distinct Groups in the Tropical Northern Territory of Australia
Source: MDPI journal article supplement (doi:10.3390/tropicalmed9040071), 2024-03-28
Supplement: s1 [file s1]

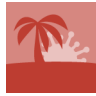

## Supplementary Materials:

# Melioidosis Knowledge Awareness in Three Distinct Groups in the Tropical Northern Territory of Australia

Madusha P. Weeratunga <sup>1,2,3</sup>, Mark Mayo <sup>1</sup> and Mirjam Kaestli <sup>1</sup> and Bart J. Currie <sup>1,2,3,\*</sup>

<sup>1</sup> Menzies School of Health Research, Charles Darwin University, Darwin, NT, 0811 Australia;  
madusha.weeratunga@nt.gov.au (M.P.W.); mark.mayo@menzies.edu.au (M.M.);  
mirjam.kaestli@menzies.edu.au (M.K.)

<sup>2</sup> Infectious Diseases Department, Royal Darwin Hospital, Darwin, NT, 0810 Australia

<sup>3</sup> Northern Territory Medical Program, Flinders and Charles Darwin University, Darwin, NT, 0810 Australia

\* Correspondence: bart.currie@menzies.edu.au

Project: Top End Awareness of Melioidosis Project  
(HREC 2021-4058)

QUESTIONNAIRE

Thank you for doing this short survey – it will take less than 5 minutes. We will use the survey to help you and your community from getting sick

**General Information**

- Gender : ☐ Male ☐ Female ☐ Other
- Age: \_\_\_\_\_ years
- Number of years lived in the Northern Territory: \_\_\_\_\_
- Highest level of education:
 

|                                                                                        |                                                                     |
|----------------------------------------------------------------------------------------|---------------------------------------------------------------------|
| <input type="checkbox"/> No schooling completed                                        | <input type="checkbox"/> Primary school (Grade 6 or equivalent)     |
| <input type="checkbox"/> High School (Grade 9 or equivalent)                           | <input type="checkbox"/> College (Grade 12 or equivalent)           |
| <input type="checkbox"/> Apprenticeship or equivalent                                  | <input type="checkbox"/> University Bachelor's degree or equivalent |
| <input type="checkbox"/> University degree higher than bachelor's degree or equivalent |                                                                     |
- Region /Post code: \_\_\_\_\_

**Have you ever heard of melioidosis?**

☐ Yes ☐ No

**Do you think these behaviours increase your chance of getting melioidosis?**

|                                                     |                              |                             |                                     |
|-----------------------------------------------------|------------------------------|-----------------------------|-------------------------------------|
| 1. Gardening in wet season                          | <input type="checkbox"/> Yes | <input type="checkbox"/> No | <input type="checkbox"/> Don't know |
| 2. Hunting out bush during wet season               | <input type="checkbox"/> Yes | <input type="checkbox"/> No | <input type="checkbox"/> Don't know |
| 3. Playing football on community oval in wet season | <input type="checkbox"/> Yes | <input type="checkbox"/> No | <input type="checkbox"/> Don't know |
| 4. Drinking sugary soft drinks                      | <input type="checkbox"/> Yes | <input type="checkbox"/> No | <input type="checkbox"/> Don't know |
| 5. Drinking tap water                               | <input type="checkbox"/> Yes | <input type="checkbox"/> No | <input type="checkbox"/> Don't know |
| 6. Smoking cigarettes                               | <input type="checkbox"/> Yes | <input type="checkbox"/> No | <input type="checkbox"/> Don't know |
| 7. Drinking alcohol                                 | <input type="checkbox"/> Yes | <input type="checkbox"/> No | <input type="checkbox"/> Don't know |
| 8. Walking without shoes                            | <input type="checkbox"/> Yes | <input type="checkbox"/> No | <input type="checkbox"/> Don't know |
| 9. Sharing needles for injections                   | <input type="checkbox"/> Yes | <input type="checkbox"/> No | <input type="checkbox"/> Don't know |

**Do you think these actions protect you from getting melioidosis?**

|                                                          |                              |                             |                                     |
|----------------------------------------------------------|------------------------------|-----------------------------|-------------------------------------|
| 1. Wearing boots and rubber gloves when working outdoors | <input type="checkbox"/> Yes | <input type="checkbox"/> No | <input type="checkbox"/> Don't know |
| 2. Wearing shoes when walking outside                    | <input type="checkbox"/> Yes | <input type="checkbox"/> No | <input type="checkbox"/> Don't know |

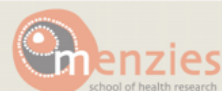

discovery for a healthy tomorrow

PO Box 41096, CASUARINA NT 0811 | John Mathews Building (Building 58), Royal Darwin Hospital Campus, Rocklands Drive, CASUARINA NT 0810 Phone: 08 8922 8196 | Facsimile: 08 8927 5187 | Web: www.menzies.edu.au | Email: info@menzies.edu.au

Project: Top End Awareness of Melioidosis Project  
(HREC 2021-4058)

|                                                   |                              |                             |                                     |
|---------------------------------------------------|------------------------------|-----------------------------|-------------------------------------|
| 3. Covering wounds with band-aids                 | <input type="checkbox"/> Yes | <input type="checkbox"/> No | <input type="checkbox"/> Don't know |
| 4. Staying indoors during storms                  | <input type="checkbox"/> Yes | <input type="checkbox"/> No | <input type="checkbox"/> Don't know |
| 5. Drinking less alcohol                          | <input type="checkbox"/> Yes | <input type="checkbox"/> No | <input type="checkbox"/> Don't know |
| 6. Eating lots of fruit and vegetables            | <input type="checkbox"/> Yes | <input type="checkbox"/> No | <input type="checkbox"/> Don't know |
| 7. Wearing a mask when using a high-pressure hose | <input type="checkbox"/> Yes | <input type="checkbox"/> No | <input type="checkbox"/> Don't know |

**How have you heard about melioidosis?**

- |                                                          |                                                              |
|----------------------------------------------------------|--------------------------------------------------------------|
| <input type="checkbox"/> I don't know what this is       | <input type="checkbox"/> From my doctor or healthcare worker |
| <input type="checkbox"/> From a family member or friend  | <input type="checkbox"/> On TV                               |
| <input type="checkbox"/> On Radio                        | <input type="checkbox"/> Newspaper                           |
| <input type="checkbox"/> At the clinic or hospital       | <input type="checkbox"/> On a poster                         |
| <input type="checkbox"/> I can't remember                |                                                              |
| <input type="checkbox"/> Other, please tell us how _____ |                                                              |

**Where did you go to find more information about melioidosis?**

- ☐ I didn't look for any information because it is not important to me
- ☐ I didn't know where to find any information
- ☐ I asked my doctor or healthcare worker
- ☐ I asked my family and friends
- ☐ I searched on the internet
- ☐ I read a pamphlet in the clinic or hospital
- ☐ I can't remember
- ☐ Other, please tell us how \_\_\_\_\_

**What do you think is the best way to help people in your community avoid getting melioidosis? Tick all that apply**

- |                                                                        |                                                                   |
|------------------------------------------------------------------------|-------------------------------------------------------------------|
| <input type="checkbox"/> Doctors and health care workers giving advice | <input type="checkbox"/> TV advertising                           |
| <input type="checkbox"/> Radio advertising                             | <input type="checkbox"/> On the Internet                          |
| <input type="checkbox"/> Posters around the community                  | <input type="checkbox"/> At schools so that my kids hear about it |
| <input type="checkbox"/> Other, please tell us how _____               |                                                                   |

**Do you know the NT government website that has a melioidosis (also known as melioid) factsheet?**

☐ Yes  
☐ No

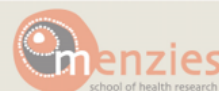

discovery for a healthy tomorrow

PO Box 41096, CASUARINA NT 0811 | John Mathews Building (Building 58), Royal Darwin Hospital Campus, Rocklands Drive, CASUARINA NT 0810 Phone: 08 8922 8196 | Facsimile: 08 8927 5187 | Web: www.menzies.edu.au | Email: info@menzies.edu.au

**Figure S1.** The questionnaire used in the study.

**Table S1.** Summary of the remaining survey questions.

| How have you heard about melioidosis?                               |         |            |         |            |         |            |
|---------------------------------------------------------------------|---------|------------|---------|------------|---------|------------|
| Variable                                                            | Group 1 |            | Group 2 |            | Group 3 |            |
|                                                                     | Num-ber | Percentage | Num-ber | Percentage | Num-ber | Percentage |
| I don't know what this is                                           | 5       | 0.04       | 16      | 0.32       | 1       | 0.04       |
| From a family member or friend                                      | 48      | 0.38       | 14      | 0.28       | 3       | 0.11       |
| On radio                                                            | 14      | 0.11       | 6       | 0.12       | 1       | 0.04       |
| At the clinic or hospital                                           | 36      | 0.29       | 8       | 0.16       | 8       | 0.29       |
| I can't remember                                                    | 11      | 0.09       | 3       | 0.06       | 1       | 0.04       |
| From my doctor or healthcare worker                                 | 13      | 0.10       | 8       | 0.16       | 5       | 0.18       |
| On TV                                                               | 20      | 0.16       | 7       | 0.14       | 1       | 0.04       |
| Newspaper                                                           | 16      | 0.13       | 1       | 0.02       | 2       | 0.07       |
| On a poster                                                         | 24      | 0.19       | 4       | 0.08       | 4       | 0.14       |
| Other                                                               | 30      | 0.24       | 10      | 0.2        | 10      | 0.36       |
| Where did you go to find more information about melioidosis?        |         |            |         |            |         |            |
| Variable                                                            | Group 1 |            | Group 2 |            | Group 3 |            |
|                                                                     | Num-ber | Percentage | Num-ber | Percentage | Num-ber | Percentage |
| I didn't look for any information because it is not important to me | 17      | 0.14       | 13      | 0.26       | 1       | 0.04       |
| I didn't know where to find any information                         | 6       | 0.05       | 7       | 0.14       | 6       | 0.21       |
| I asked my doctor or healthcare worker                              | 15      | 0.12       | 17      | 0.34       | 12      | 0.43       |

| I asked my family and friends                                                                        | 10      | 0.08       | 7       | 0.14       | 4       | 0.14       |
|------------------------------------------------------------------------------------------------------|---------|------------|---------|------------|---------|------------|
| I searched on the Internet                                                                           | 84      | 0.67       | 11      | 0.22       | 6       | 0.21       |
| I read a pamphlet in the clinic or hospital                                                          | 11      | 0.09       | 9       | 0.18       | 2       | 0.07       |
| I can't remember                                                                                     | 7       | 0.06       | 1       | 0.02       | 2       | 0.07       |
| Others                                                                                               | 14      | 0.11       | 0       | 0          | 2       | 0.07       |
| <b>What do you think is the best way to help people in your community avoid getting melioidosis?</b> |         |            |         |            |         |            |
| Variable                                                                                             | Group 1 |            | Group 2 |            | Group 3 |            |
|                                                                                                      | Num-ber | Percentage | Num-ber | Percentage | Num-ber | Percentage |
| Doctors and health care workers giving advice                                                        | 87      | 0.70       | 35      | 0.7        | 21      | 0.75       |
| Radio advertising                                                                                    | 61      | 0.49       | 30      | 0.6        | 11      | 0.39       |
| Posters                                                                                              | 74      | 0.59       | 29      | 0.58       | 8       | 0.29       |
| TV advertising                                                                                       | 78      | 0.62       | 16      | 0.32       | 15      | 0.54       |
| On the Internet                                                                                      | 66      | 0.53       | 18      | 0.36       | 8       | 0.29       |
| At schools so that my kids hear about it                                                             | 85      | 0.68       | 31      | 0.62       | 13      | 0.46       |
| Other                                                                                                | 15      | 0.12       | 8       | 0.16       | 4       | 0.14       |
